# Supplementary material for: Temperamental Sensitivities Differentially Linked With Interest, Strain, and Effort Appraisals
Source: Frontiers journal article supplement (doi:10.3389/fpsyg.2020.551806), 2021-01-08
Supplement: Data_Sheet_1.pdf [file Data_Sheet_1.pdf]

SUPPLEMENTARY APPENDIX A.

*Factor Loadings and Explained Variance (ESEM) of Temperamental Sensitivity Items (Study 1).*

| Factors and Items                                                                   | 1            | 2           | 3           | 4           | R <sup>2</sup> |
|-------------------------------------------------------------------------------------|--------------|-------------|-------------|-------------|----------------|
| <b>1 PUNISHMENT SENSITIVITY</b>                                                     |              |             |             |             |                |
| <i>I am easily shy in the company of people I don't know and in new situations.</i> | <b>.741</b>  | -.058       | .147        | -.029       | .498           |
| <i>I feel very uncomfortable in new situations and places.</i>                      | <b>.726</b>  | .118        | -.046       | -.069       | .586           |
| <i>I prefer to withdraw in situations that feel unpleasant or difficult.</i>        | <b>.649</b>  | .027        | .038        | .189        | .397           |
| <i>I get upset easily if I am criticised or told off.</i>                           | <b>.505</b>  | .121        | -.036       | .218        | .294           |
| <i>I don't like talking or performing in public (e.g., answering in class).</i>     | <b>.504</b>  | -.171       | -.076       | .014        | .321           |
| <b>2 INTERINDIVIDUAL REWARD SENSITIVITY</b>                                         |              |             |             |             |                |
| <i>I often do things just to be praised (e.g., by the teacher).</i>                 | -.066        | <b>.689</b> | -.028       | -.119       | .434           |
| <i>I often aim to impress other people.</i>                                         | .103         | <b>.625</b> | -.047       | .033        | .405           |
| <i>I will gladly be the centre of attention.</i>                                    | .080         | <b>.524</b> | .236        | .036        | .389           |
| <i>I sometimes act hastily just to get a reward or praise.</i>                      | -.175        | <b>.386</b> | .102        | .212        | .348           |
| <b>3 INTRAINDIVIDUAL REWARD SENSITIVITY (NOVELTY-SEEKING)</b>                       |              |             |             |             |                |
| <i>I find new things exciting.</i>                                                  | .016         | -.103       | <b>.848</b> | .018        | .693           |
| <i>I think it is exciting to get into new and surprising situations.</i>            | -.083        | .033        | <b>.684</b> | -.087       | .493           |
| <i>I will readily seek out novel situations.</i>                                    | <b>-.341</b> | .081        | <b>.401</b> | .127        | .474           |
| <b>4 INTRAINDIVIDUAL REWARD SENSITIVITY (POSITIVE EXPRESSIVENESS)</b>               |              |             |             |             |                |
| <i>I don't hold back my joy and enthusiasm when something nice happens to me.</i>   | -.025        | -.068       | -.047       | <b>.826</b> | .639           |
| <i>I express my excitement and enjoyment openly, when I succeed at something.</i>   | -.001        | .133        | .103        | <b>.615</b> | .502           |

Note. Factor loadings significant at  $p < .001$  given in bold, and  $p < .05$  in italics. All R<sup>2</sup> significant at  $p < .001$ .

*Factor Loadings and Explained Variance (CFA) of Motivational Appraisal Items (Study 1).*

| Factors and Items                                                                              | 1    | 2     | 3    | R <sup>2</sup> |
|------------------------------------------------------------------------------------------------|------|-------|------|----------------|
| 1 MATHEMATICS INTEREST                                                                         |      |       |      |                |
| <i>I am interested in math.</i> <sup>a</sup>                                                   | .910 |       |      | .828           |
| <i>Math is a personally important subject for me.</i> <sup>b</sup>                             | .848 |       |      | .719           |
| <i>I look forward to math classes a lot.</i> <sup>b</sup>                                      | .811 |       |      | .658           |
| <i>I would like to learn more about some of the things we do in math classes.</i> <sup>a</sup> | .757 |       |      | .572           |
| <i>It is important for me to understand math.</i> <sup>c</sup>                                 | .721 |       |      | .520           |
| <i>I like doing math things also in my spare time.</i> <sup>a</sup>                            | .718 |       |      | .515           |
| <i>I enjoy challenging math tasks.</i> <sup>c</sup>                                            | .567 | -.395 |      | .705           |
| <i>I sometimes look at math-related web sites in my spare time.</i> <sup>a</sup>               | .495 |       |      | .245           |
| 2 MATHEMATICS STRAIN                                                                           |      |       |      |                |
| <i>The topics and tasks in math are really demanding</i>                                       |      | .732  |      | .536           |
| <i>Math classes are really exhausting</i>                                                      |      | .701  |      | .491           |
| <i>Studying math stresses me out.</i>                                                          |      | .634  |      | .401           |
| 3 MATHEMATICS EFFORT                                                                           |      |       |      |                |
| <i>I always try my best in math classes.</i> <sup>d</sup>                                      |      |       | .802 | .644           |
| <i>I put serious effort into solving the math problems we do in class.</i> <sup>e</sup>        |      |       | .802 | .643           |
| <i>I always try to solve all problems we have for homework in math.</i> <sup>d</sup>           |      |       | .791 | .626           |

Note. All factor loadings and R<sup>2</sup> significant at  $p < .001$ . Item sources: <sup>a</sup>Frenzel, Goetz, Pekrun, & Watt (2010); <sup>b</sup>Marsh, Trautwein, Lüdtke, Köller, & Baumert (2005); <sup>c</sup>Gottfried (1985); <sup>d</sup>Trautwein et al. (2015); <sup>e</sup>Trautwein, Lüdtke, Roberts, Schnyder, & Niggli (2009).

SUPPLEMENTARY APPENDIX B.

*Bootstrapped Factor Loadings of Latent Variables (Study 2).*

| Factors and Items                                                                   | Finnish<br>(N = 140) | Swedish<br>(N = 124) | English<br>(N = 141) | Mathematics<br>(N = 81)            |
|-------------------------------------------------------------------------------------|----------------------|----------------------|----------------------|------------------------------------|
| <b>PUNISHMENT SENSITIVITY</b>                                                       |                      |                      |                      |                                    |
| <i>I feel very uncomfortable in new situations and places.</i>                      | .76                  | .71                  | .77                  | .75                                |
| <i>I am easily shy in the company of people I don't know and in new situations.</i> | .68                  | .71                  | .67                  | .74                                |
| <i>I avoid talking or performing in public (e.g., at lectures).</i>                 | .69                  | .70                  | .72                  | .79                                |
| <i>I get upset easily if I am criticized or told off.</i>                           | .55 <sup>b</sup>     | .66                  | .59 <sup>b</sup>     | .68                                |
| <b>INTERINDIVIDUAL REWARD SENSITIVITY</b>                                           |                      |                      |                      |                                    |
| <i>I often do things just to be praised.</i>                                        | .74                  | .71                  | .76                  | .74                                |
| <i>I will gladly be the centre of attention.</i>                                    | .54                  | .65                  | .60                  | .73                                |
| <i>I sometimes act hastily just to get an immediate reward or praise.</i>           | .72                  | .85                  | .82                  | .72                                |
| <b>INTRAINDIVIDUAL REWARD SENSITIVITY</b>                                           |                      |                      |                      |                                    |
| <i>I don't hold back my joy and enthusiasm when something nice happens to me.</i>   | .71                  | .74                  | .72                  | .75                                |
| <i>I express my excitement and enjoyment openly, when I succeed at something.</i>   | .75                  | .75                  | .72                  | .75                                |
| <i>I will readily seek out novel situations.</i>                                    | .71                  | .78                  | .73                  | .64                                |
| <i>I get excited about new things easily.</i>                                       | .80                  | .76                  | .81                  | .66                                |
| <b>COURSE INTEREST<sup>a</sup></b>                                                  |                      |                      |                      |                                    |
| <i>This course is/has been interesting.</i>                                         | .92/.89              | .90/.91              | .91/.92              | .91/.92                            |
| <i>The contents of the course are/have been interesting.</i>                        | .91/.89              | .91/.93              | .92/.91              | .91/.89                            |
| <i>The topics of the course are/have been really boring. (r)</i>                    | .77/.79              | .74/.76              | .61/.83              | .80/.83                            |
| <b>COURSE STRAIN<sup>a</sup></b>                                                    |                      |                      |                      |                                    |
| <i>The topics and tasks of the course are/have been really difficult.</i>           | .84/.80              | .85/.81              | .85/.89              | .89/.92                            |
| <i>Studying on this course is/has been really exhausting.</i>                       | .81/.78              | .73/.84              | .72/.85              | .76/.83                            |
| <i>This course stresses/has stressed me.</i>                                        | .61/.74              | .75/.79              | .82/.87              | .84/.79                            |
| <i>The course is/has been easy. (r)</i>                                             | .57/.74              | .80/.88              | .86/.86              | .87/.86                            |
| <b>COURSE EFFORT<sup>a</sup></b>                                                    |                      |                      |                      |                                    |
| <i>I work/have worked hard to learn what is covered in the course.</i>              | .81/.82              | .70/.79              | .82/.90              | .55 <sup>b</sup> /.62 <sup>b</sup> |
| <i>I always do/have always done all course homework.</i>                            | .76/.76              | .83/.84              | .57/.62              | .67 <sup>b</sup> /.78              |
| <i>I put/have put serious effort into completing the course.</i>                    | .87/.88              | .86/.83              | .82/.90              | .78/.85                            |

Note. <sup>a</sup>Time 1/time 2. <sup>b</sup>Item loading not significant at 95% CI, retained within latent variable as DG p satisfactory and AVE > .5. (r) reverse-coded

*Latent Correlations and Square Root of Average Variance Extracted of Variables (Finnish, N =140; Study 2).*

| Variable               | 1    | 2    | 3    | 4    | 5    | 6    | 7    | 8    | 9    | 10   | 11   | 12  |
|------------------------|------|------|------|------|------|------|------|------|------|------|------|-----|
| 1 SP                   | .734 |      |      |      |      |      |      |      |      |      |      |     |
| 2 SRinter              | .11  | .718 |      |      |      |      |      |      |      |      |      |     |
| 3 SRintra              | -.43 | .29  | .756 |      |      |      |      |      |      |      |      |     |
| 4 Subject Interest     | -.05 | -.00 | .13  | -    |      |      |      |      |      |      |      |     |
| 5 Previous Achievement | .01  | -.07 | -.05 | .34  | -    |      |      |      |      |      |      |     |
| 6 Course Interest t1   | -.16 | -.02 | .21  | .45  | .21  | .872 |      |      |      |      |      |     |
| 7 Course Strain t1     | .13  | .18  | -.01 | -.23 | -.15 | -.42 | .723 |      |      |      |      |     |
| 8 Course Effort t1     | -.09 | -.04 | .19  | .24  | .11  | .53  | -.21 | .815 |      |      |      |     |
| 9 Course Interest t2   | -.14 | -.02 | .27  | .41  | .15  | .70  | -.36 | .38  | .855 |      |      |     |
| 10 Course Strain t2    | .15  | .21  | .05  | -.18 | -.06 | -.12 | .55  | -.05 | -.22 | .722 |      |     |
| 11 Course Effort t2    | -.09 | .09  | .26  | .22  | .14  | .42  | -.19 | .71  | .42  | .05  | .822 |     |
| 12 Course Grade        | .06  | -.11 | -.09 | .14  | .56  | .03  | -.09 | .07  | .07  | -.11 | .06  | -   |
| 13 Course Satisfaction | -.02 | -.10 | -.14 | .06  | .28  | -.11 | .05  | .02  | -.08 | -.18 | -.05 | .48 |

*Note.* Correlations  $\geq |.17|$  are significant at  $p < .05$ . SP = Sensitivity to Punishment; SRinter = Interindividual Reward Sensitivity; SRintra = Intraindividual Reward Sensitivity. The square root of AVE is given on the diagonal.

*Latent Correlations and Square Root of Average Variance Extracted of Variables (Swedish, N = 124; Study 2).*

| Variable               | 1    | 2    | 3    | 4    | 5    | 6    | 7    | 8    | 9    | 10   | 11   | 12  |
|------------------------|------|------|------|------|------|------|------|------|------|------|------|-----|
| 1 SP                   | .711 |      |      |      |      |      |      |      |      |      |      |     |
| 2 SRinter              | .11  | .758 |      |      |      |      |      |      |      |      |      |     |
| 3 SRintra              | -.34 | .35  | .777 |      |      |      |      |      |      |      |      |     |
| 4 Subject Interest     | .13  | -.02 | .07  | -    |      |      |      |      |      |      |      |     |
| 5 Previous Achievement | .15  | -.19 | -.19 | .52  | -    |      |      |      |      |      |      |     |
| 6 Course Interest t1   | .06  | .09  | .19  | .54  | .36  | .856 |      |      |      |      |      |     |
| 7 Course Strain t1     | .02  | .21  | -.01 | -.50 | -.46 | -.49 | .785 |      |      |      |      |     |
| 8 Course Effort t1     | -.05 | -.11 | .12  | .18  | .23  | .61  | -.21 | .803 |      |      |      |     |
| 9 Course Interest t2   | -.07 | .08  | .25  | .51  | .26  | .79  | -.48 | .54  | .873 |      |      |     |
| 10 Course Strain t2    | -.04 | .24  | .10  | -.42 | -.47 | -.40 | .79  | -.15 | -.40 | .829 |      |     |
| 11 Course Effort t2    | -.14 | -.13 | .18  | .17  | .20  | .50  | -.18 | .79  | .49  | -.15 | .826 |     |
| 12 Course Grade        | .23  | -.13 | -.24 | .50  | .80  | .33  | -.44 | .18  | .26  | -.48 | .15  | -   |
| 13 Course Satisfaction | .04  | -.21 | -.19 | .33  | .57  | .18  | -.39 | .18  | .22  | -.47 | .18  | .66 |

*Note.* Correlations  $\geq |.18|$  are significant at  $p < .05$ . SP = Sensitivity to Punishment; SRinter = Interindividual Reward Sensitivity; SRintra = Intraindividual Reward Sensitivity. The square root of AVE is given on the diagonal.

*Latent Correlations and Square Root of Average Variance Extracted of Variables (English, N = 141; Study 2).*

| Variable               | 1    | 2    | 3    | 4    | 5    | 6    | 7    | 8    | 9    | 10   | 11   | 12  |
|------------------------|------|------|------|------|------|------|------|------|------|------|------|-----|
| 1 SP                   | .732 |      |      |      |      |      |      |      |      |      |      |     |
| 2 SRinter              | .08  | .741 |      |      |      |      |      |      |      |      |      |     |
| 3 SRintra              | -.47 | .30  | .762 |      |      |      |      |      |      |      |      |     |
| 4 Subject Interest     | -.06 | -.04 | .02  | -    |      |      |      |      |      |      |      |     |
| 5 Previous Achievement | .12  | -.18 | -.17 | .56  | -    |      |      |      |      |      |      |     |
| 6 Course Interest t1   | -.13 | .03  | .07  | .46  | .21  | .831 |      |      |      |      |      |     |
| 7 Course Strain t1     | .07  | .36  | .12  | -.51 | -.56 | -.27 | .815 |      |      |      |      |     |
| 8 Course Effort t1     | -.10 | .13  | .15  | .01  | -.11 | .44  | .18  | .762 |      |      |      |     |
| 9 Course Interest t2   | -.09 | .06  | .14  | .47  | .28  | .72  | -.31 | .31  | .888 |      |      |     |
| 10 Course Strain t2    | .01  | .31  | .16  | -.53 | -.55 | -.23 | .84  | .26  | -.30 | .867 |      |     |
| 11 Course Effort t2    | -.18 | .04  | .19  | .01  | -.10 | .36  | .20  | .77  | .27  | .29  | .825 |     |
| 12 Course Grade        | .13  | -.21 | -.28 | .51  | .82  | .24  | -.55 | -.13 | .27  | -.60 | -.11 | -   |
| 13 Course Satisfaction | .07  | -.12 | -.23 | .34  | .49  | .18  | -.38 | -.09 | .18  | -.44 | -.14 | .67 |

*Note.* Correlations  $\geq |.17|$  are significant at  $p < .05$ . SP = Sensitivity to Punishment; SRinter = Interindividual Reward Sensitivity; SRintra = Intraindividual Reward Sensitivity. The square root of AVE is given on the diagonal.

*Latent Correlations and Square Root of Average Variance Extracted of Variables (Mathematics, N =81; Study 2).*

| Variable               | 1    | 2    | 3    | 4    | 5    | 6    | 7    | 8    | 9    | 10   | 11   | 12  |
|------------------------|------|------|------|------|------|------|------|------|------|------|------|-----|
| 1 SP                   | .782 |      |      |      |      |      |      |      |      |      |      |     |
| 2 SRinter              | .06  | .763 |      |      |      |      |      |      |      |      |      |     |
| 3 SRintra              | -.43 | .32  | .733 |      |      |      |      |      |      |      |      |     |
| 4 Subject Interest     | -.06 | -.04 | .32  | -    |      |      |      |      |      |      |      |     |
| 5 Previous Achievement | -.01 | -.24 | -.11 | .10  | -    |      |      |      |      |      |      |     |
| 6 Course Interest t1   | -.20 | -.06 | .29  | .62  | .06  | .873 |      |      |      |      |      |     |
| 7 Course Strain t1     | .09  | .24  | -.04 | -.39 | -.39 | -.44 | .842 |      |      |      |      |     |
| 8 Course Effort t1     | -.11 | -.14 | .33  | .19  | -.11 | .43  | .09  | .746 |      |      |      |     |
| 9 Course Interest t2   | -.14 | -.10 | .37  | .57  | -.07 | .73  | -.29 | .52  | .880 |      |      |     |
| 10 Course Strain t2    | -.04 | .28  | .11  | -.36 | -.53 | -.44 | .79  | .06  | -.22 | .853 |      |     |
| 11 Course Effort t2    | -.24 | -.10 | .26  | .29  | .11  | .40  | -.13 | .65  | .39  | -.17 | .767 |     |
| 12 Course Grade        | .03  | -.12 | -.04 | .15  | .69  | .17  | -.35 | .03  | .02  | -.55 | .34  | -   |
| 13 Course Satisfaction | .11  | -.17 | -.14 | .14  | .46  | .11  | -.48 | -.02 | .05  | -.50 | .12  | .57 |

*Note.* Correlations  $\geq |.22|$  are significant at  $p < .05$ . SP = Sensitivity to Punishment; SRinter = Interindividual Reward Sensitivity; SRintra = Intraindividual Reward Sensitivity. The square root of AVE is given on the diagonal.

*Indirect Effects on Dependent Variables (Study 2).*

| Predictor                          | Course Interest t2 |           | Course Strain t2 |            | Course Effort t2 |           | Course Grade |            | Course Satisfaction |            |
|------------------------------------|--------------------|-----------|------------------|------------|------------------|-----------|--------------|------------|---------------------|------------|
|                                    | $\beta$            | 95% CI    | $\beta$          | 95% CI     | $\beta$          | 95% CI    | $\beta$      | 95% CI     | $\beta$             | 95% CI     |
| <b>FINNISH (<i>N</i> = 140)</b>    |                    |           |                  |            |                  |           |              |            |                     |            |
| SP                                 | -.02               | -.20, .20 | .12              | -.29, .39  | -.01             | -.21, .20 | .06          | -.14, .23  | -.06                | -.25, .15  |
| SRinter                            | -.07               | -.26, .12 | .17              | -.03, .35  | .05              | -.20, .25 | -.07         | -.22, .08  | -.03                | -.23, .21  |
| SRintra                            | .24                | .08, .40  | .07              | -.16, .28  | .22              | .02, .42  | -.00         | -.15, .16  | -.13                | -.32, .07  |
| Subject Interest                   | .37                | .22, .51  | -.19             | -.34, -.01 | .16              | -.02, .33 | -.05         | -.18, .10  | -.03                | -.18, .13  |
| Pr. Achievement                    | .03                | -.11, .17 | .01              | -.16, .21  | .09              | -.09, .26 | .57          | .45, .69   | .28                 | .11, .44   |
| Course Interest t1                 |                    |           |                  |            |                  |           | -.14         | -.32, .05  | -.21                | -.41, .01  |
| Course Strain t1                   |                    |           |                  |            |                  |           | -.06         | -.21, .11  | .06                 | -.12, .26  |
| Course Effort t1                   |                    |           |                  |            |                  |           | .08          | -.08, .24  | .13                 | -.07, .30  |
| <b>SWEDISH (<i>N</i> = 124)</b>    |                    |           |                  |            |                  |           |              |            |                     |            |
| SP                                 | -.04               | -.21, .15 | -.01             | -.20, .21  | -.04             | -.26, .23 | .09          | -.05, .22  | -.06                | -.25, .13  |
| SRinter                            | .02                | -.17, .20 | .18              | .02, .35   | -.18             | -.38, .07 | .03          | -.09, .15  | -.08                | -.27, .10  |
| SRintra                            | .21                | .03, .37  | .00              | -.18, .15  | .27              | .08, .46  | -.09         | -.22, .05  | -.11                | -.29, .07  |
| Subject Interest                   | .45                | .29, .59  | -.25             | -.43, -.07 | .05              | -.18, .26 | .12          | -.02, .25  | .07                 | -.11, .24  |
| Pr. Achievement                    | .08                | -.09, .26 | -.30             | -.50, -.12 | .20              | -.03, .43 | .72          | .60, .83   | .50                 | .34, .67   |
| Course Interest t1                 |                    |           |                  |            |                  |           | -.01         | -.19, .19  | -.19                | -.42, .05  |
| Course Strain t1                   |                    |           |                  |            |                  |           | -.09         | -.23, .06  | -.19                | -.39, .01  |
| Course Effort t1                   |                    |           |                  |            |                  |           | .01          | -.14, .16  | .15                 | -.06, .36  |
| <b>ENGLISH (<i>N</i> = 141)</b>    |                    |           |                  |            |                  |           |              |            |                     |            |
| SP                                 | .01                | -.17, .22 | .01              | -.18, .22  | -.12             | -.37, .16 | -.03         | -.17, .11  | -.06                | -.25, .13  |
| SRinter                            | .03                | -.15, .21 | .21              | .04, .36   | -.02             | -.23, .19 | -.01         | -.13, .09  | .02                 | -.14, .20  |
| SRintra                            | .15                | -.03, .34 | .06              | -.09, .21  | .12              | -.11, .32 | -.16         | -.27, -.06 | -.20                | -.37, -.03 |
| Subject Interest                   | .42                | .23, .60  | -.34             | -.50, -.17 | .06              | -.17, .28 | .10          | -.01, .21  | .12                 | -.02, .29  |
| Pr. Achievement                    | .09                | -.07, .27 | -.31             | -.49, -.16 | -.10             | -.32, .12 | .73          | .65, .81   | .40                 | .23, .57   |
| Course Interest t1                 |                    |           |                  |            |                  |           | .10          | -.01, .21  | .10                 | -.09, .28  |
| Course Strain t1                   |                    |           |                  |            |                  |           | -.08         | -.19, .03  | -.09                | -.29, .13  |
| Course Effort t1                   |                    |           |                  |            |                  |           | -.06         | -.17, .06  | -.08                | -.25, .11  |
| <b>MATHEMATICS (<i>N</i> = 81)</b> |                    |           |                  |            |                  |           |              |            |                     |            |
| SP                                 | -.02               | -.21, .19 | -.00             | -.26, .29  | -.15             | -.41, .16 | .05          | -.15, .25  | .07                 | -.24, .35  |
| SRinter                            | -.17               | -.39, .13 | .14              | -.10, .35  | -.11             | -.35, .15 | .02          | -.17, .19  | -.04                | -.28, .19  |
| SRintra                            | .23                | -.06, .52 | .11              | -.22, .39  | .22              | -.09, .54 | .03          | -.20, .26  | -.08                | -.32, .20  |
| Subject Interest                   | .49                | .31, .66  | -.36             | -.53, -.15 | .18              | -.13, .46 | .09          | -.07, .27  | .12                 | -.07, .31  |
| Pr. Achievement                    | -.14               | -.31, .05 | -.44             | -.57, -.27 | -.01             | -.36, .26 | .68          | .53, .80   | .42                 | .20, .61   |
| Course Interest t1                 |                    |           |                  |            |                  |           | .05          | -.23, .34  | -.15                | -.49, .16  |
| Course Strain t1                   |                    |           |                  |            |                  |           | -.07         | -.29, .16  | -.42                | -.67, -.20 |
| Course Effort t1                   |                    |           |                  |            |                  |           | .12          | -.33, .40  | .17                 | -.15, .49  |

*Note.* SP = Punishment Sensitivity; SRinter = Interindividual Reward Sensitivity; SRintra = Intraindividual Reward Sensitivity; Pr. Achievement = Previous Achievement. CI = confidence interval.

## Supplementary Material

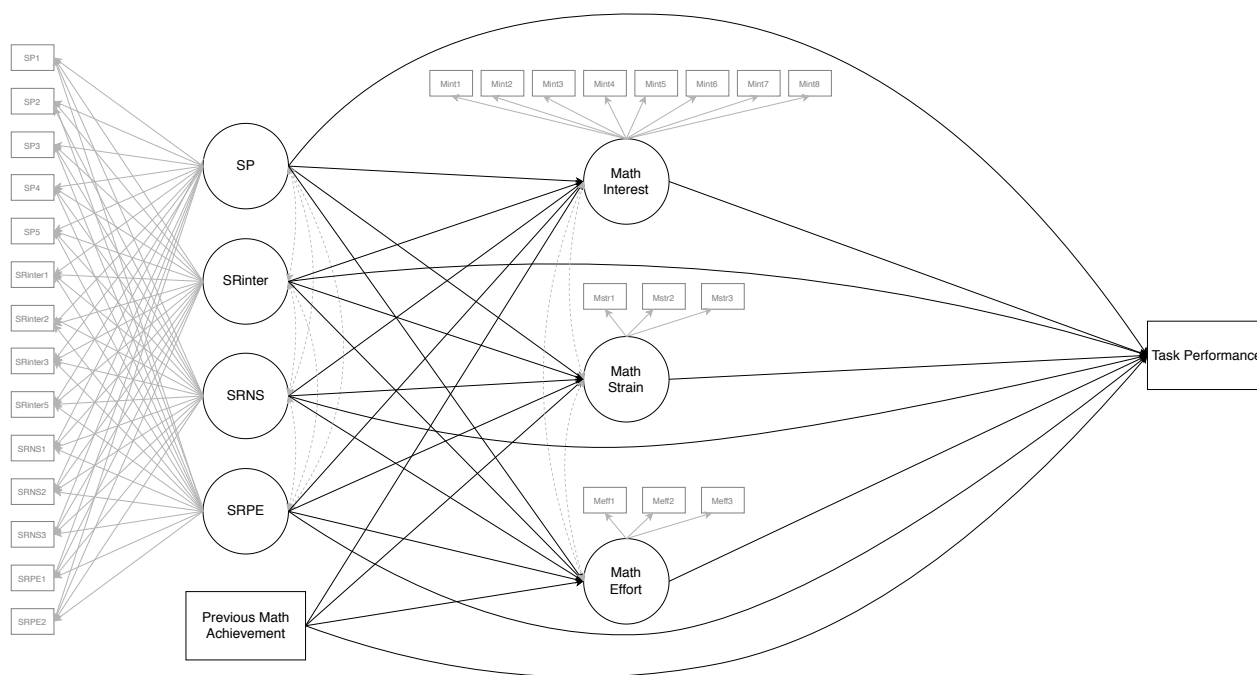

**Supplementary Figure 1.** Hypothetical model for Study 1. SP = Punishment Sensitivity; SRinter = Interindividual Reward Sensitivity; SRNS = Intraindividual Reward Sensitivity – Novelty-Seeking; SRPE = Intraindividual Reward Sensitivity – Positive Expressiveness.

| Measurements and stages of data collection        |   |                              |   |                              |   |                                                    |
|---------------------------------------------------|---|------------------------------|---|------------------------------|---|----------------------------------------------------|
| Beginning of school year                          |   | Early part of course         |   | End of course                |   | Beginning of next course                           |
| Temperamental sensitivities and subject interests | A | Motivational appraisals (t1) | B | Motivational appraisals (t2) | C | Satisfaction with grades (of the preceding course) |

**Supplementary Figure 2.** Measurements and stages of data collection in Study 2. A = Passage of time varies due to study group differences; B = Passage of time ca. 1.5. months; C = Passage of time ca. 1 week.
